# Supplementary material
Source: MDPI journal article supplement (https://www.mdpi.com/2076-3417/12/23/12187)
Supplement: s1 [file s1]

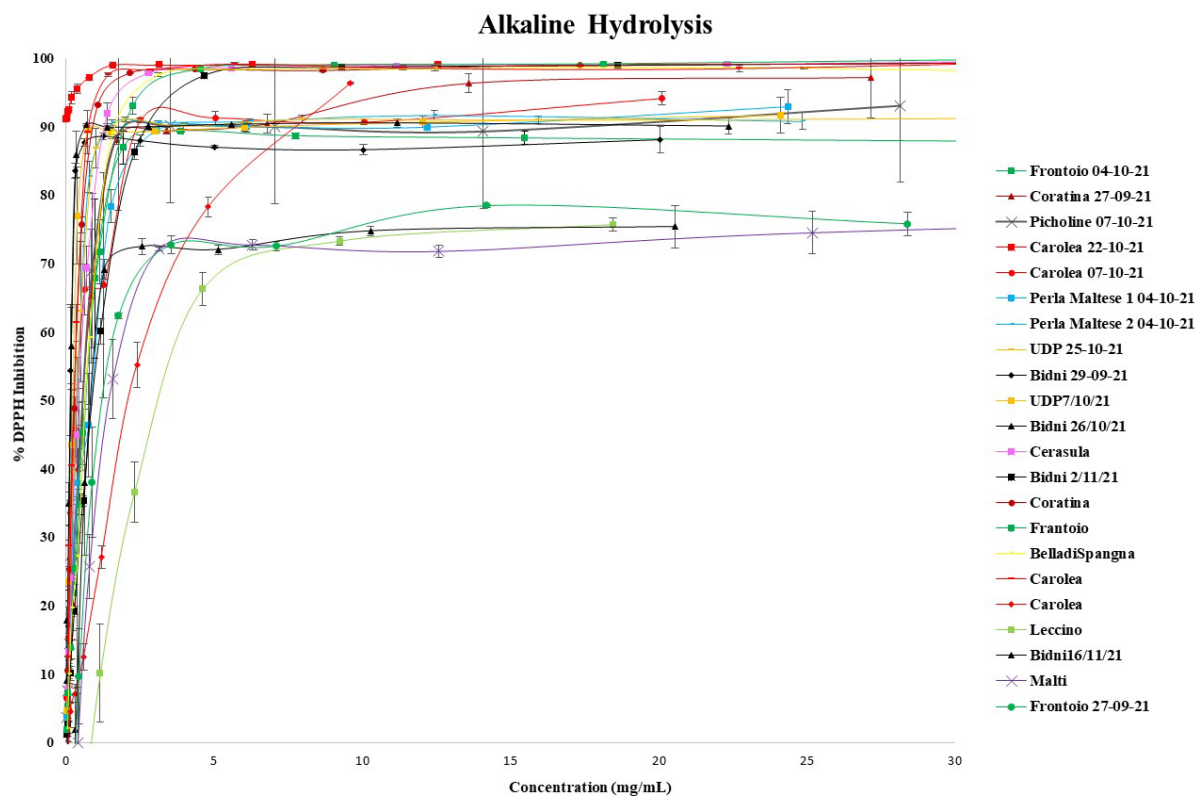

Figure S1: A graph showing the percentage DPPH inhibition for all extracts in alkaline hydrolysis.

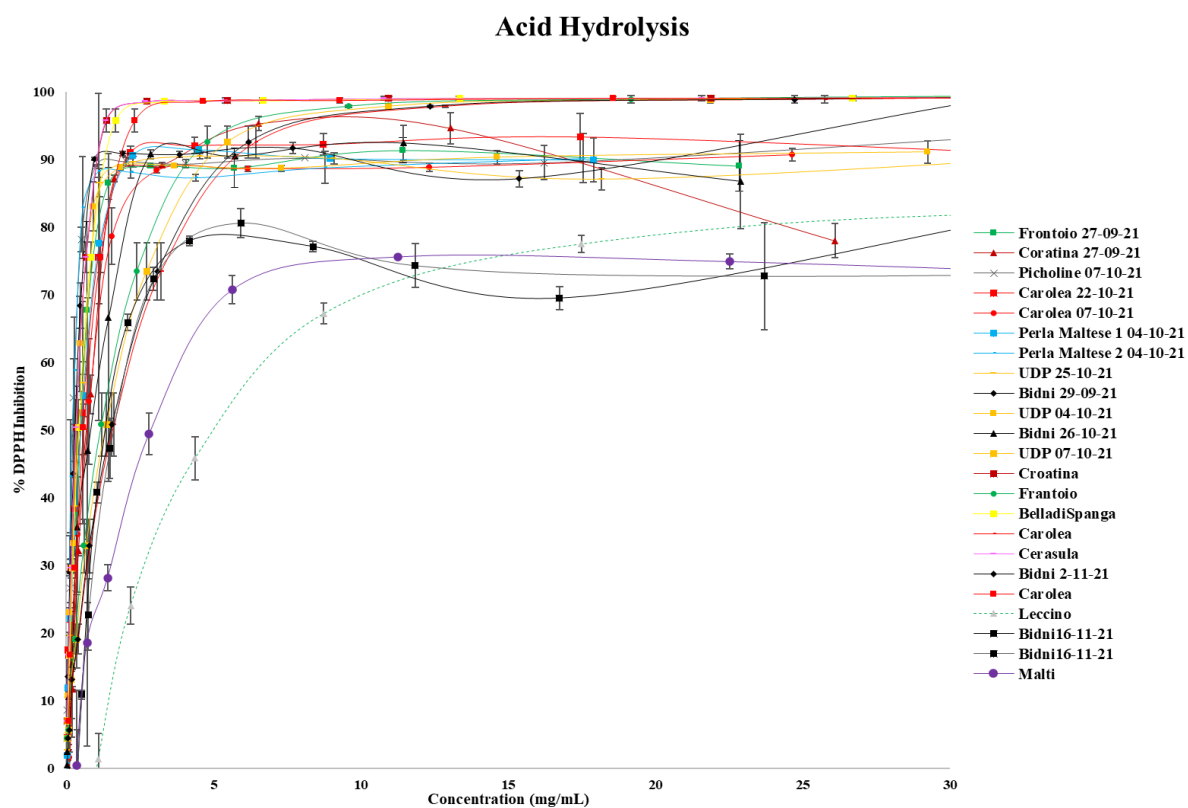

Figure S2: A graph showing the percentage DPPH inhibition for all extracts in acid hydrolysis.

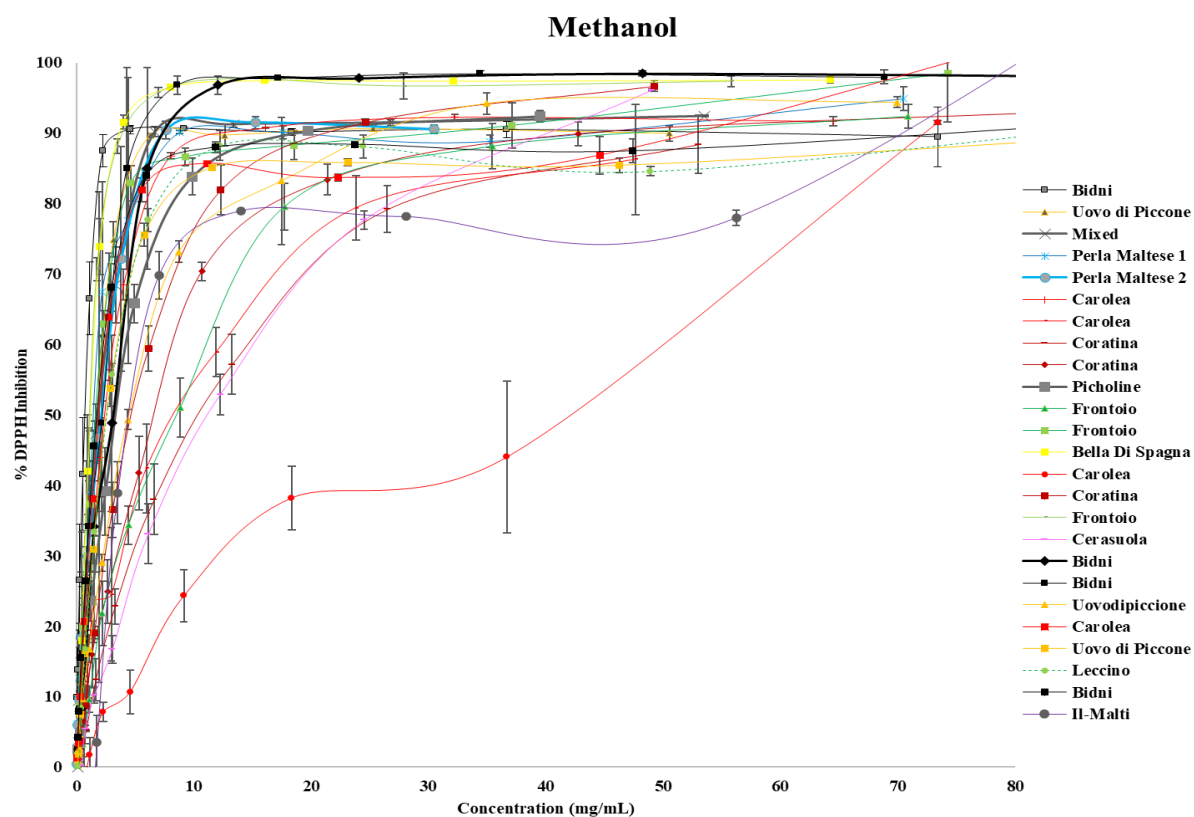

Figure S3: A graph showing the percentage DPPH inhibition for all extracts in maceration extraction.

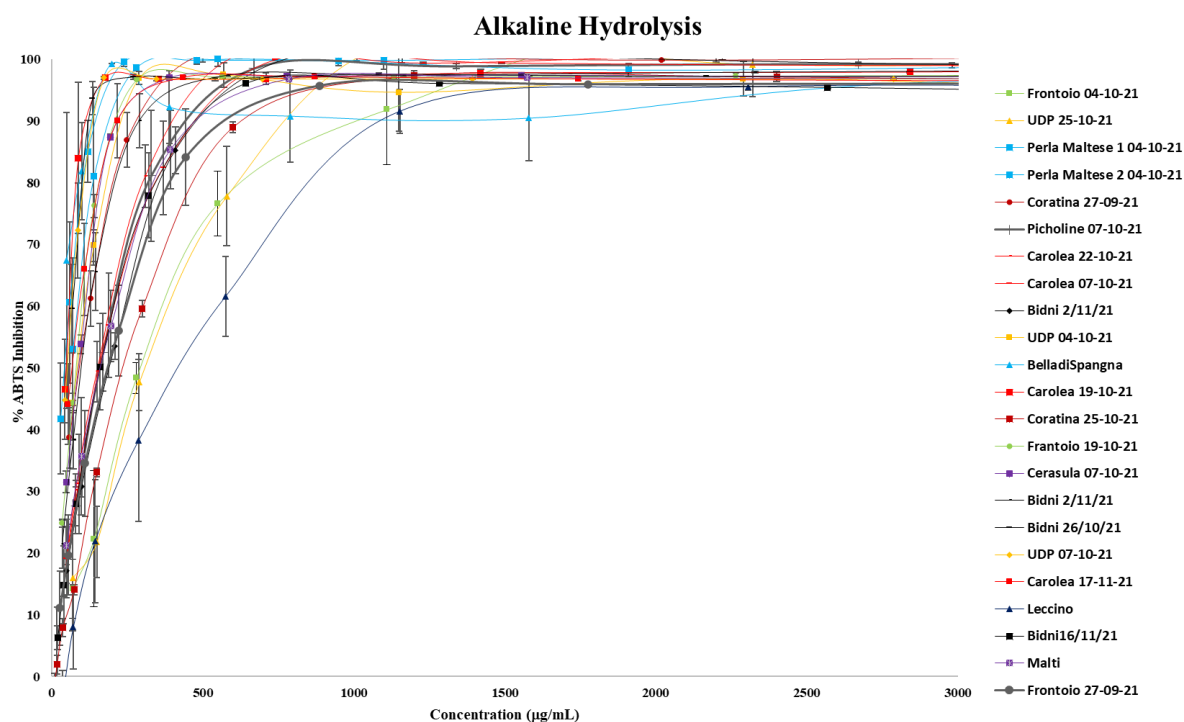

Figure S4: A graph showing the percentage ABTS inhibition for all extracts in alkaline hydrolysis.

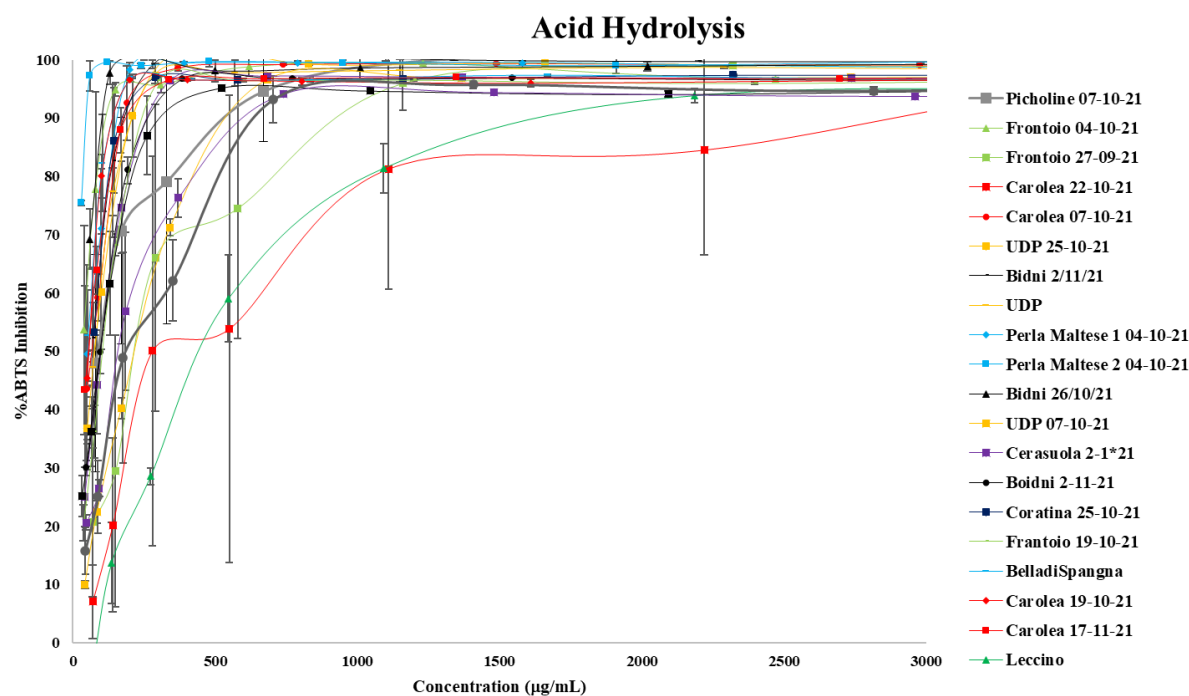

Figure S5: A graph showing the percentage ABTS inhibition for all extracts in acid hydrolysis.

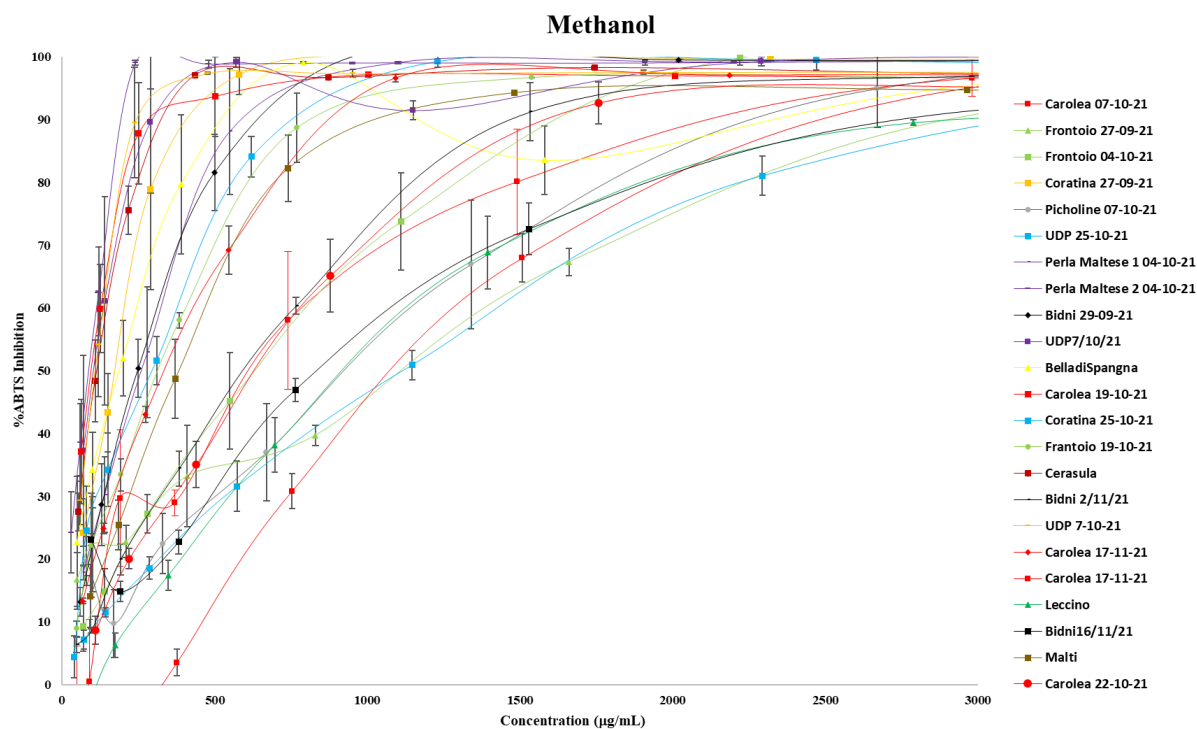

Figure S6: A graph showing the percentage ABTS inhibition for all extracts in maceration extraction.

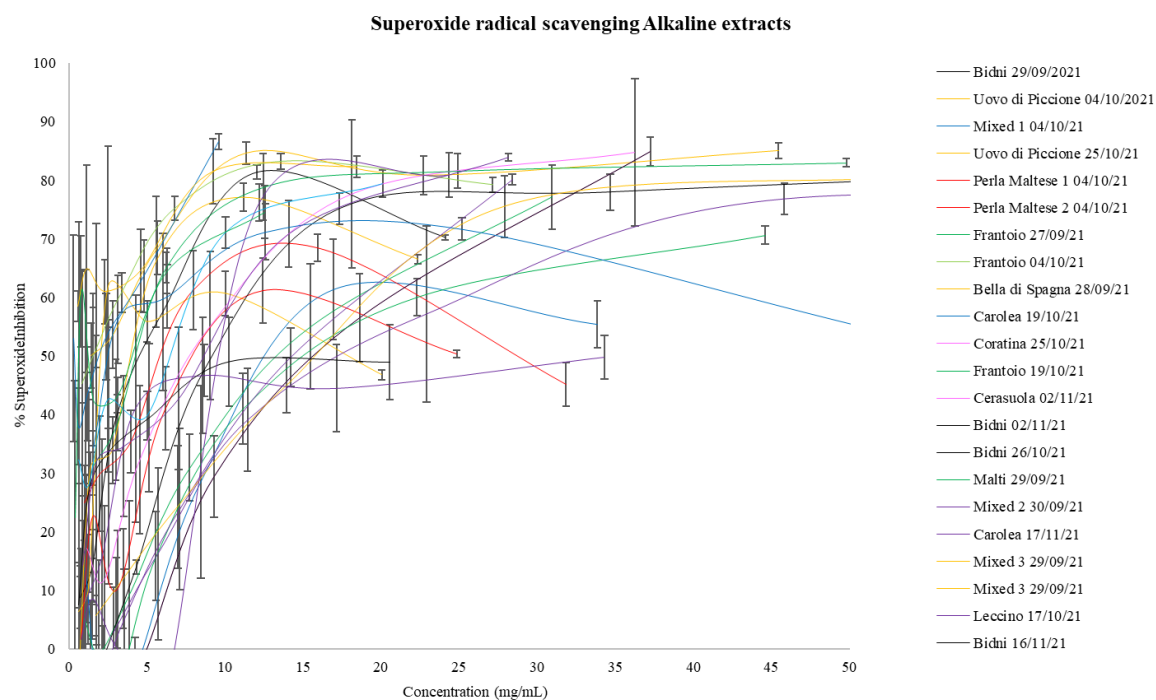

**Figure S7: A graph showing the percentage superoxide inhibition for all extracts in alkaline hydrolysed extracts.**

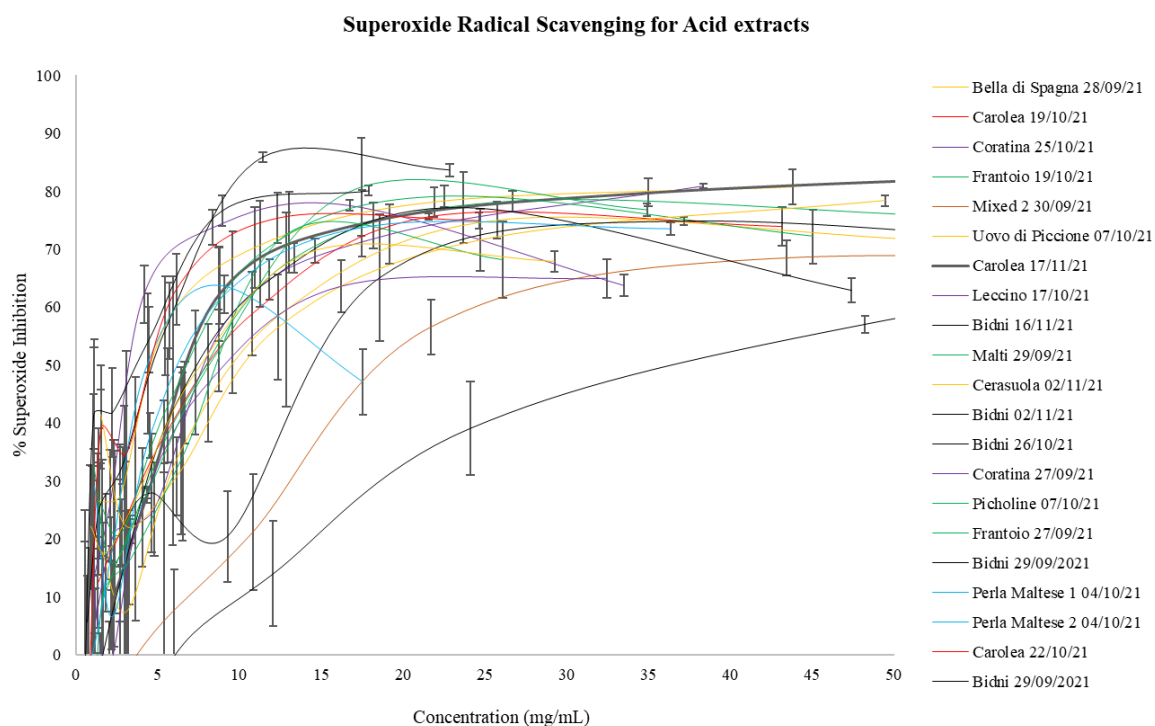

**Figure S8: A graph showing the percentage superoxide inhibition for all extracts in acid hydrolysed extracts.**

### Superoxide Radical Scavenging for Methanol extracts

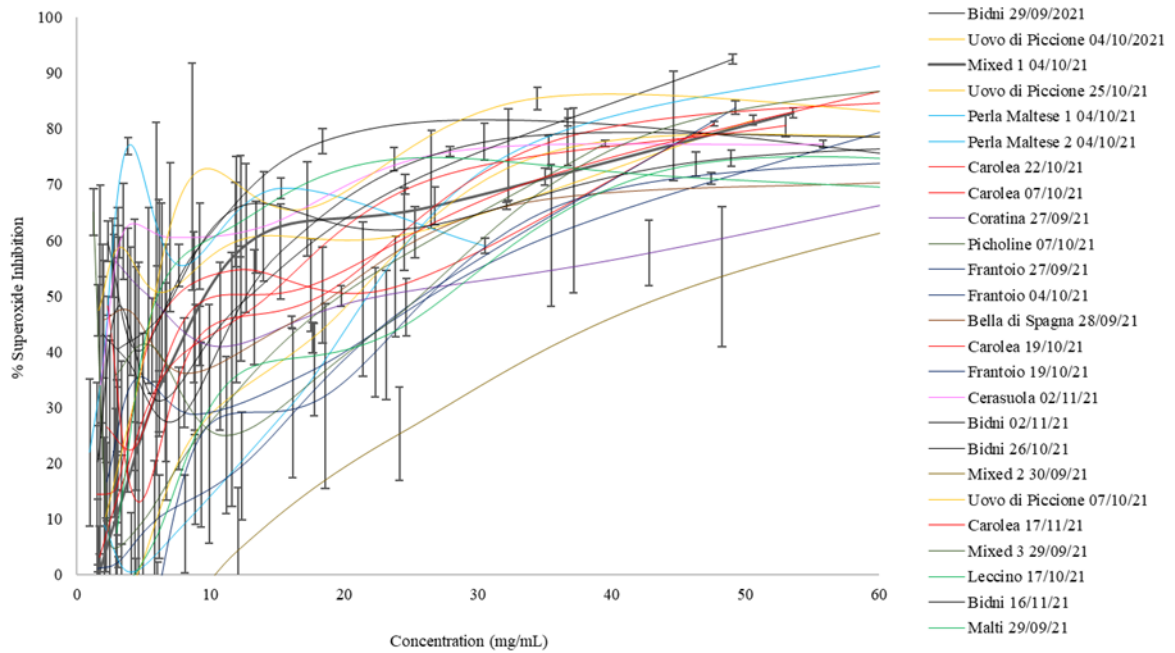

Figure S9: A graph showing the percentage superoxide inhibition for all extracts in macerated extracts.

Table S1: Extraction yields obtained

|    | Name                    | Date       | Yeild in mg |        |          |
|----|-------------------------|------------|-------------|--------|----------|
|    |                         |            | Methanol    | Acid   | Alkaline |
| A  | Bidni                   | 9/29/2021  | 146.80      | 58.50  | 48.20    |
| B  | Uovo di Piccone         | 10/4/2021  | 101.10      | 45.80  | 44.70    |
| C  | Parent mixed            | 10/2/2021  | 107.10      | 52.10  | 67.70    |
| D  | Uovo di Piccone         | 10/25/2021 | 141.00      | 61.50  | 39.60    |
| E  | Perla Maltese 1         | 10/4/2021  | 60.10       | 35.10  | 49.70    |
| F  | Perla Maltese 2         | 10/4/2021  | 129.00      | 72.70  | 63.70    |
| G  | Carolea                 | 10/22/2021 | 95.30       | 49.30  | 40.20    |
| H  | Carolea                 | 10/7/2021  | 106.00      | 35.80  | 48.70    |
| I  | Coratina                | 9/27/2021  | 171.10      | 64.90  | 56.30    |
| J  | Picholine               | 10/7/2021  | 79.00       | 69.80  | 25.10    |
| K  | Frontoio                | 9/27/2021  | 141.80      | 52.20  | 61.90    |
| L  | Frontoio                | 10/4/2021  | 148.50      | 45.70  | 54.30    |
| M  | Bella Di Spagna         | 9/28/2021  | 128.50      | 103.00 | 90.90    |
| N  | Carolea                 | 10/19/2021 | 146.80      | 86.30  | 19.20    |
| O  | Coratina                | 10/25/2021 | 89.70       | 76.70  | 72.50    |
| P  | Frontoio                | 10/19/2021 | 111.60      | 106.80 | 99.60    |
| Q  | Cerasuola               | 11/2/2021  | 98.10       | 98.80  | 74.50    |
| R  | Bidni                   | 11/2/2021  | 121.90      | 148.60 | 138.70   |
| S  | Bidni                   | 10/26/2021 | 192.90      | 87.50  | 89.20    |
| T  | Frantoio al peperoncino | 10/25/2021 | 146.20      | 117.50 | 85.40    |
| U  | Kancillier mixed        | 9/30/2021  | 137.70      | 173.70 | 183.30   |
| V  | Uovo di Piccone         | 10/7/2021  | 139.30      | 87.60  | 111.60   |
| W  | Carolea                 | 11/17/2021 | 178.40      | 139.90 | 36.90    |
| X  | San niklaw mixed        | 9/29/2021  | 185.10      | 119.90 | 68.60    |
| Y  | Leccino                 | 10/17/2021 | 195.70      | 67.00  | 41.10    |
| Z  | Bidni                   | 11/16/2021 | 189.70      | 94.80  | 100.70   |
| A1 | Il-Malti                | 9/29/2021  | 224.90      | 109.30 | 56.80    |
